# Supplementary material
Source: publisher site journal article supplement (https://www.spandidos-publications.com/4544/downloadSupplementary)
Supplement: Supplementary file 1 [file downloadSupplementary]

## Sheet: Sheet1
Table SIII. Tissue-NSCLC and ctDNA-NSCLC.
A, Summary for Tissue-NSCLC (n=69)					B, Gene summary for tissue-NSCLC (n=69)												C, Summary for ctDNA-NSCLC (n=51)					D, Gene summary for ctDNA-NSCLC (n=51)
ID	summary	Mean	Median		Hugo_Symbol	Frame_Shift_Del	Frame_Shift_Ins	In_Frame_Del	In_Frame_Ins	Missense_Mutation	Nonsense_Mutation	Splice_Site	total	MutatedSamples	AlteredSamples		ID	summary	Mean	Median		Hugo_Symbol	In_Frame_Del	In_Frame_Ins	Missense_Mutation	Nonsense_Mutation	Splice_Site	total	MutatedSamples	AlteredSamples
NCBI_Build	NA	NA	NA		TP53	2	2	1	0	28	8	7	48	43	43		NCBI_Build	NA	NA	NA		TP53	2	0	11	3	2	18	15	15
Center	NA	NA	NA		EGFR	0	0	11	2	14	0	0	27	26	26		Center	NA	NA	NA		EGFR	3	0	5	0	0	8	8	8
Samples	62	NA	NA		RB1	0	0	4	0	2	2	3	11	9	9		Samples	38	NA	NA		CD3EAP	5	0	0	0	0	5	5	5
nGenes	32	NA	NA		PIK3CA	0	0	2	0	6	0	0	8	8	8		nGenes	30	NA	NA		PIK3CA	0	0	4	0	0	4	4	4
Frame_Shift_Del	2	0.032	0		KRAS	0	0	0	0	7	0	0	7	7	7		In_Frame_Del	10	0.263	0		RB1	0	0	1	3	0	4	4	4
Frame_Shift_Ins	2	0.032	0		CD3EAP	0	0	6	0	0	0	0	6	6	6		In_Frame_Ins	1	0.026	0		TPMT	0	0	3	1	0	4	4	4
In_Frame_Del	26	0.419	0		CTNNB1	0	0	0	0	6	0	0	6	6	6		Missense_Mutation	53	1.395	1		DPYD	0	0	3	0	0	3	3	3
In_Frame_Ins	3	0.048	0		APC	0	0	0	0	2	3	0	5	5	5		Nonsense_Mutation	9	0.237	0		KRAS	0	0	3	0	0	3	3	3
Missense_Mutation	94	1.516	1		CYP2D6	0	0	0	0	0	0	5	5	5	5		Splice_Site	4	0.105	0		NTRK1	0	0	2	0	1	3	3	3
Nonsense_Mutation	13	0.21	0		HRAS	0	0	0	0	4	0	0	4	4	4		total	77	2.026	2		CDKN2A	0	0	1	1	0	2	2	2
Splice_Site	17	0.274	0		ERBB4	0	0	0	0	3	0	0	3	3	3							ERBB2	0	1	1	0	0	2	2	2
total	157	2.532	2		PDGFRA	0	0	0	0	3	0	0	3	3	3							FGFR3	0	0	2	0	0	2	2	2
					DPYD	0	0	0	0	2	0	0	2	2	2							HRAS	0	0	2	0	0	2	2	2
					FBXW7	0	0	0	0	2	0	0	2	2	2							ALK	0	0	1	0	0	1	1	1
					NRAS	0	0	0	0	2	0	0	2	2	2							APC	0	0	1	0	0	1	1	1
					TPMT	0	0	0	0	2	0	0	2	2	2							ATM	0	0	0	1	0	1	1	1
					ATM	0	0	0	0	1	0	0	1	1	1							BRAF	0	0	1	0	0	1	1	1
					CDKN2A	0	0	0	0	1	0	0	1	1	1							CDA	0	0	1	0	0	1	1	1
					ERBB2	0	0	0	1	0	0	0	1	1	1							CTNNB1	0	0	1	0	0	1	1	1
					JAK2	0	0	0	0	1	0	0	1	1	1							CYP2D6	0	0	0	0	1	1	1	1
					KIT	0	0	0	0	0	0	1	1	1	1							IDH1	0	0	1	0	0	1	1	1
					MAP2K1	0	0	0	0	1	0	0	1	1	1							KDR	0	0	1	0	0	1	1	1
					MET	0	0	0	0	1	0	0	1	1	1							KIT	0	0	1	0	0	1	1	1
					MTOR	0	0	0	0	1	0	0	1	1	1							NRAS	0	0	1	0	0	1	1	1
					NOS3	0	0	1	0	0	0	0	1	1	1							OBSCN	0	0	1	0	0	1	1	1
					NQO1	0	0	0	0	1	0	0	1	1	1							ROS1	0	0	1	0	0	1	1	1
					OBSCN	0	0	1	0	0	0	0	1	1	1							SRC	0	0	1	0	0	1	1	1
					SMAD4	0	0	0	0	1	0	0	1	1	1							TERT	0	0	1	0	0	1	1	1
					SMO	0	0	0	0	0	0	1	1	1	1							VHL	0	0	1	0	0	1	1	1
					SOD2	0	0	0	0	1	0	0	1	1	1							XRCC1	0	0	1	0	0	1	1	1
					TERT	0	0	0	0	1	0	0	1	1	1
					VHL	0	0	0	0	1	0	0	1	1	1
